# Supplementary material
Source: publisher figshare collection journal article supplement (https://tandf.figshare.com/articles/dataset/_/11472651)
Supplement: Supplementary file 1 [file 3]

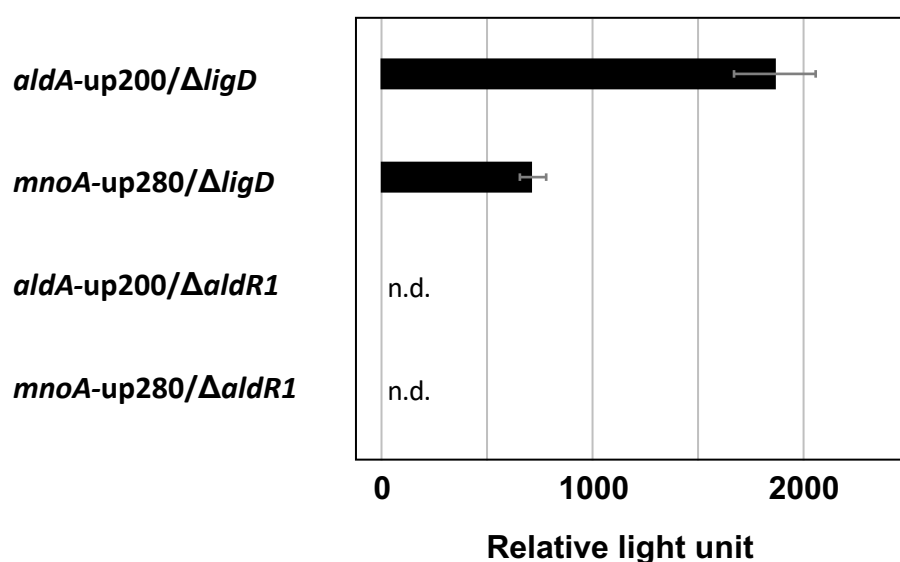

Fig. S1. Promoter analysis for *aldA* and *mnoA* in  $\Delta$ *ligD* and  $\Delta$ *aldR1*. *aldA*-up200 and *mnoA*-up280 represent pKLA1 having 200- and 280-bp fragments upstream of *aldA* and *mnoA*, respectively.  $\Delta$ *ligD* and  $\Delta$ *aldR1* were transformed by the two reporter plasmids. Each transformants was cultivated in BM containing 1% glucose and 20  $\mu$ g/mL kanamycin at 30° C for 16 h. Luciferase assay was performed by the method described in the legend of Fig. 1 in the text. n.d.: not detected.
